# Supplementary material for: Significant effect of base on the improvement of selectivity in the hydrogenation of benzoic acid over NiZrB amorphous alloy supported on γ-Al2O3
Source: Royal Society of Chemistry journal article supplement (doi:10.1039/c5cy00115c), 2015-01-01
Supplement: c5cy00115c1.pdf [file c5cy00115c1.pdf]

# Catalysis Science & Technology

## **Significant effect of base on the selectivity improvement in the hydrogenation of benzoic acid over NiZrB amorphous alloy supported on $\gamma$ -Al<sub>2</sub>O<sub>3</sub>**

*Xin Wen,<sup>a,b</sup> Yingying Cao,<sup>a</sup> Xianliang Qiao,<sup>a</sup> Libo Niu,<sup>a</sup> Li Huo<sup>a</sup> and Guoyi Bai<sup>\*a</sup>*

*<sup>a</sup> Key Laboratory of Chemical Biology of Hebei Province, College of Chemistry and Environmental Science, Hebei University, Baoding 071002, China.*

*<sup>b</sup> Hebei Chemical and Pharmaceutical College, Shijiazhuang 050026, China.*

# Electronic Supplementary Information (ESI)

## Table of contents

|                                                                       |         |
|-----------------------------------------------------------------------|---------|
| <b>Fig. S1</b> FTIR patterns.....                                     | Page S3 |
| <b>Fig. S2</b> Time-conversion plot of hydrogenation of BA. ....      | Page S4 |
| <b>Fig. S3</b> Recycle runs of catalyst in cyclohexane and water..... | Page S5 |
| <b>Fig. S4</b> TEM image and size distribution .....                  | Page S6 |
| <b>Fig. S5</b> XRD patterns of amorphous alloy catalysts.....         | Page S7 |
| <b>Fig. S6</b> GC-MS analysis of the hydrogenation product.....       | Page S8 |

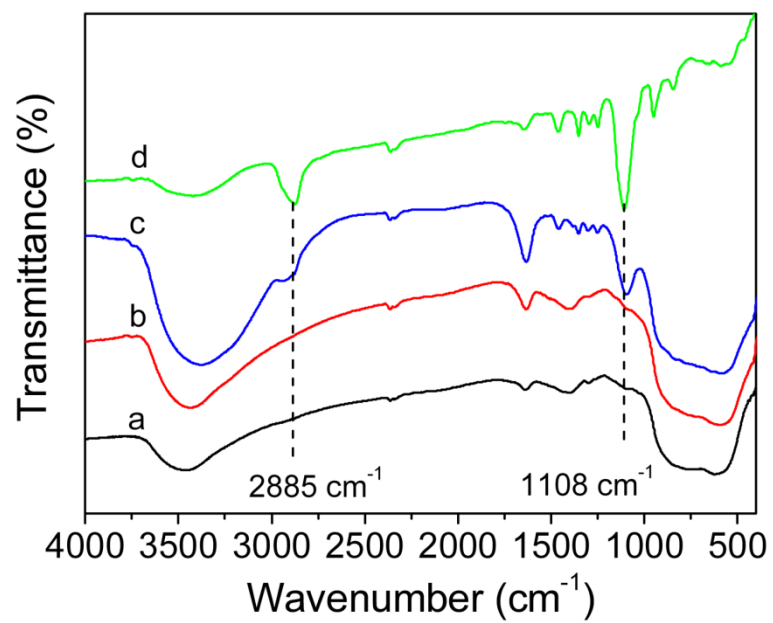

**Fig. S1** FTIR patterns of (a) NiZrB/Al<sub>2</sub>O<sub>3</sub>, (b) NiZrB/Al<sub>2</sub>O<sub>3</sub> (without PEG(800)), (c) precursor of NiZrB/Al<sub>2</sub>O<sub>3</sub>, and (d) PEG(800).

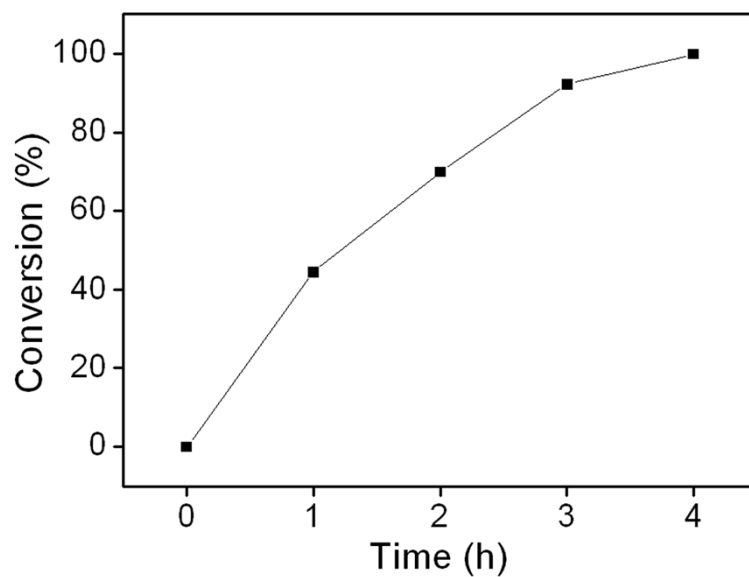

**Fig. S2** Time-conversion plot of hydrogenation of BA. Reaction conditions: BA (3.0 g), cyclohexane (60 mL), NiZrB/Al<sub>2</sub>O<sub>3</sub> (1.0 g, 11.0 wt % of Ni), K<sub>2</sub>CO<sub>3</sub> (5 mol % of BA), 423 K, initial  $P$  (H<sub>2</sub>) = 5 MPa.

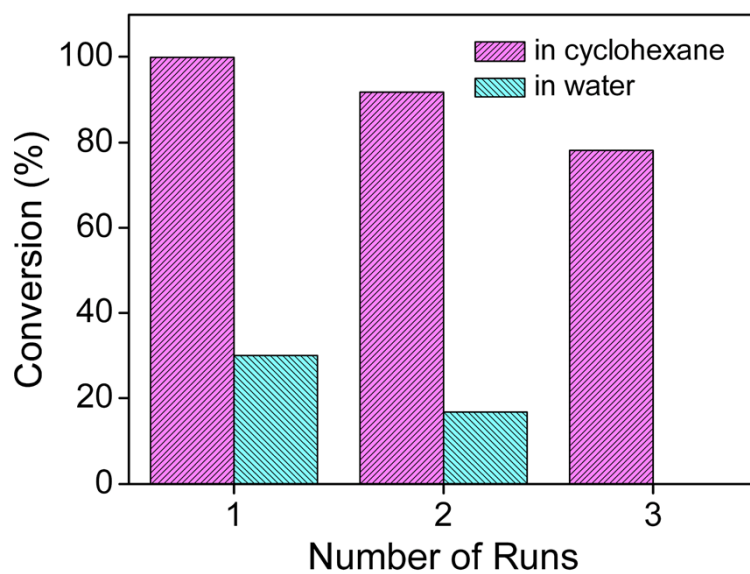

**Fig. S3** Recycle runs of catalyst in cyclohexane and water. Reaction conditions: BA (3.0 g), cyclohexane (60 mL), NiZrB/Al<sub>2</sub>O<sub>3</sub> (1.0 g, 11.0 wt % of Ni), K<sub>2</sub>CO<sub>3</sub> (5 mol % of BA), 423 K, initial  $P$  (H<sub>2</sub>) = 5 MPa and reaction time 4 h.

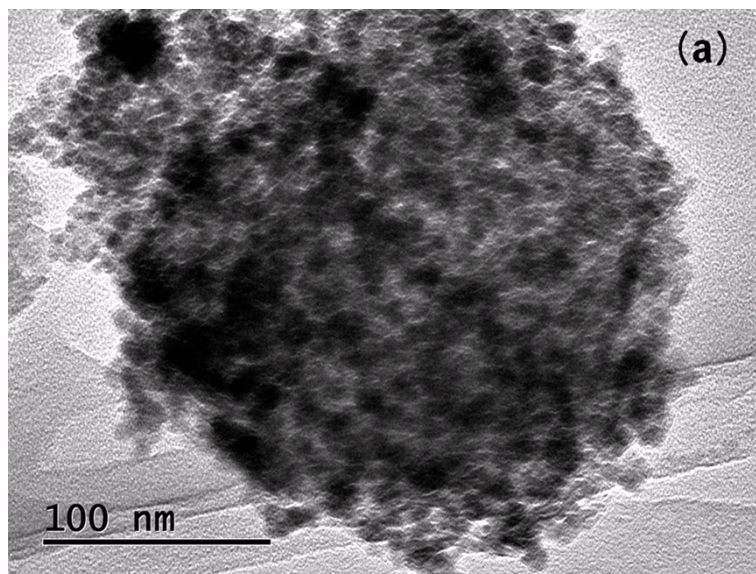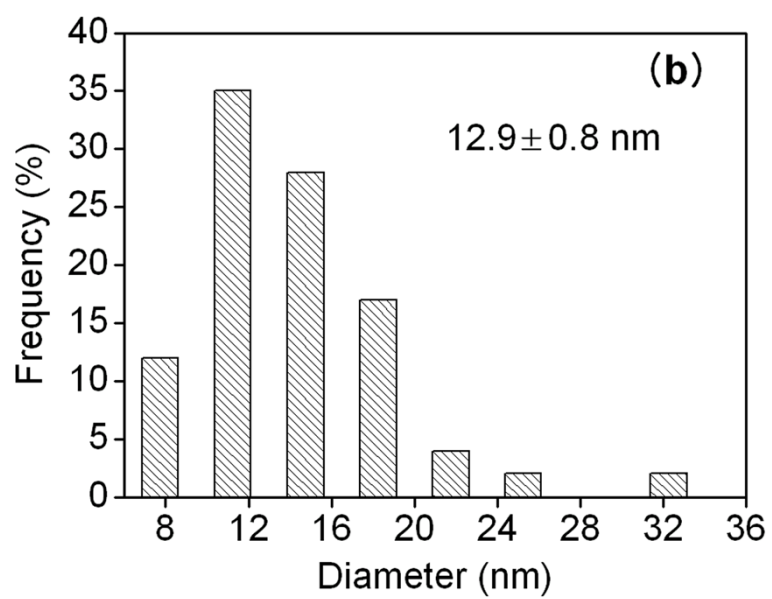

**Fig. S4** TEM image (a) and size distribution (b) of NiZrB/Al<sub>2</sub>O<sub>3</sub>-u-K<sub>2</sub>CO<sub>3</sub>.

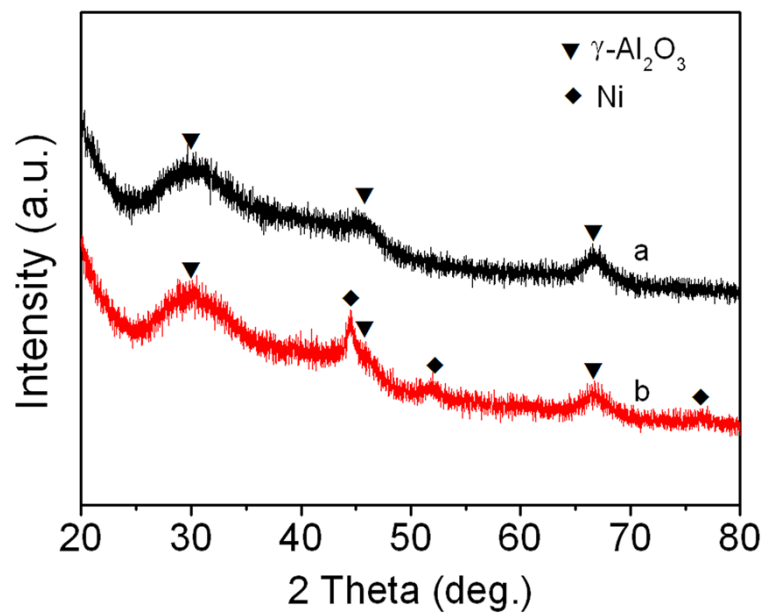

**Fig. S5** XRD patterns of amorphous alloy catalysts. (a) NiZrB/Al<sub>2</sub>O<sub>3</sub> and (b) NiZrB/Al<sub>2</sub>O<sub>3</sub>-u-K<sub>2</sub>CO<sub>3</sub>.

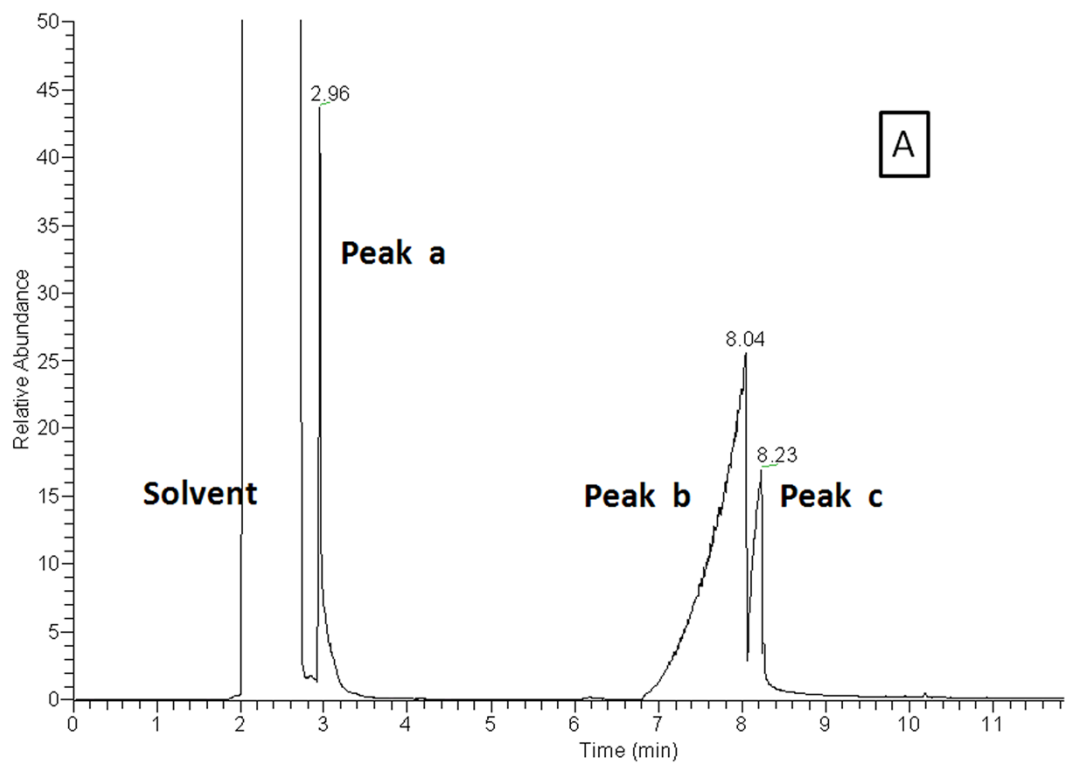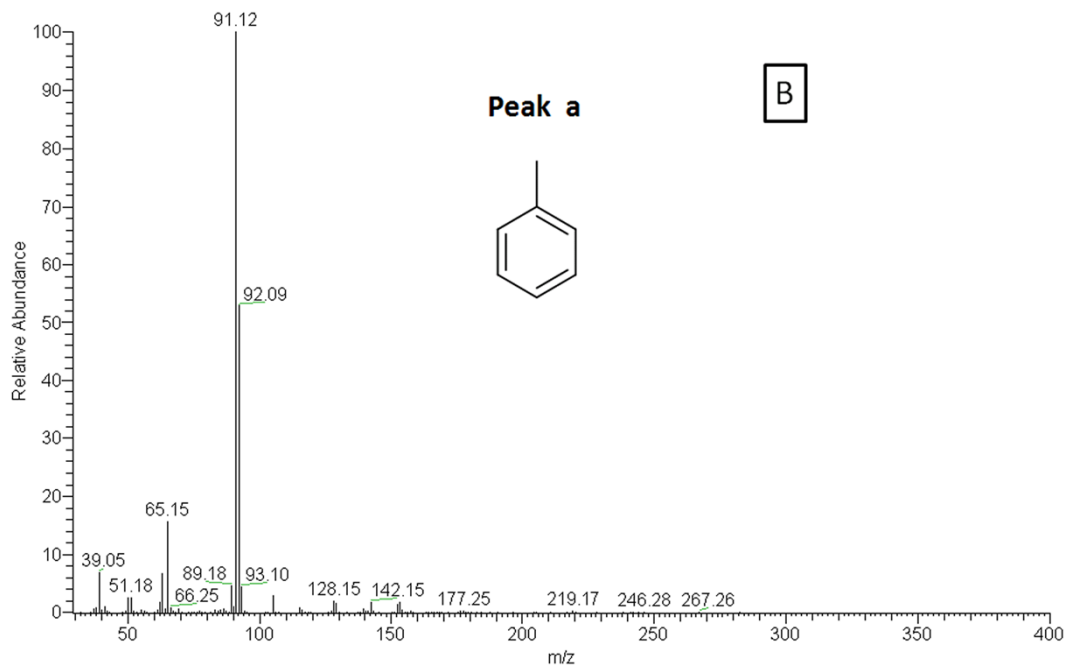



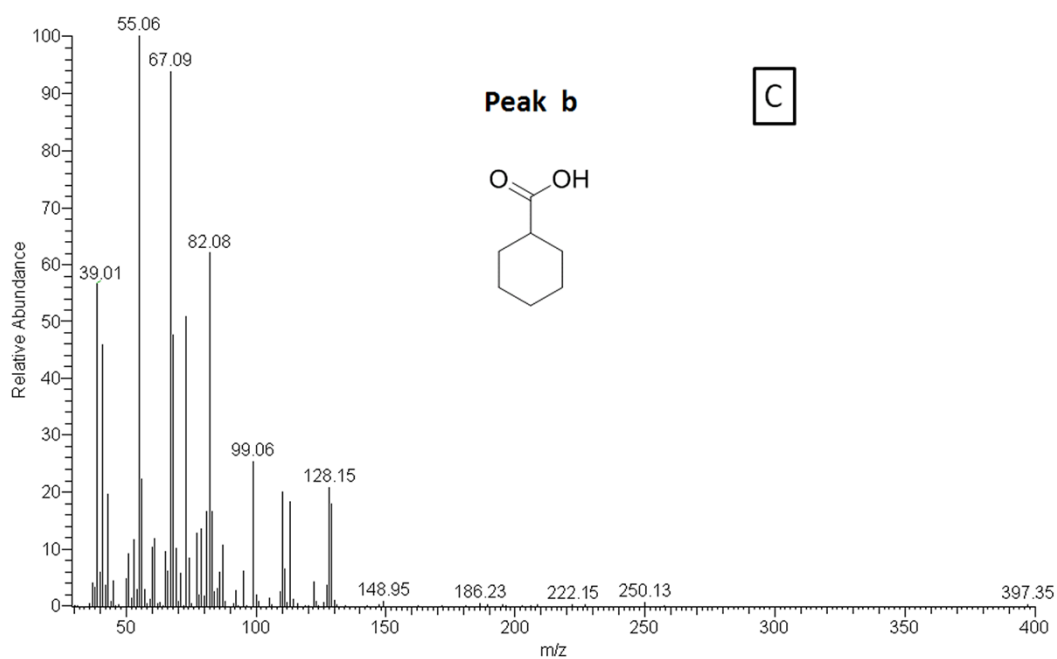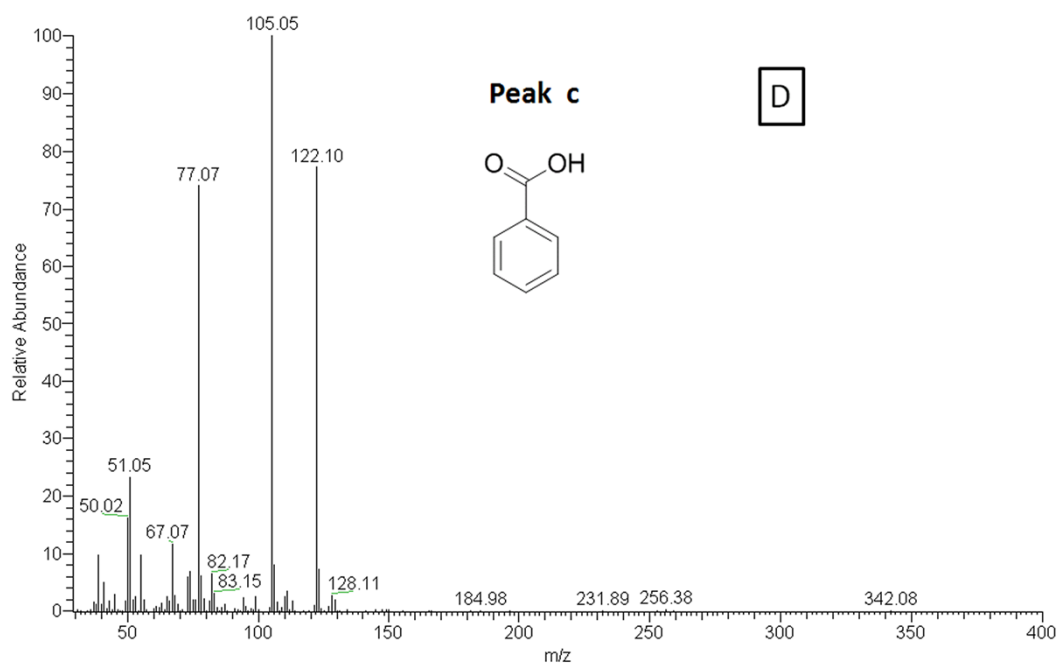

**Fig. S6** GC-MS analysis of the hydrogenation products. (A) GC analysis, (B-D) the MS patterns of peak a, b, and c in GC analysis.
